# Supplementary material
Source: Royal Society of Chemistry journal article supplement (doi:10.1039/d6fo00286b)
Supplement: d6fo00286b2.pdf [file d6fo00286b2.pdf]

Efficacy of Different Dietary Fiber for Chronic Idiopathic Constipation: A Systematic Review  
and Network Meta-Analysis

**Supplementary Table 1**

Table 1a. The retrieval used in WEB OF SCIENCE

|    |                                                                                                                                                                                                                                                                                                                                                                                                                                                                                                                                                                                                                                                                                                                                                                                                                                                             |
|----|-------------------------------------------------------------------------------------------------------------------------------------------------------------------------------------------------------------------------------------------------------------------------------------------------------------------------------------------------------------------------------------------------------------------------------------------------------------------------------------------------------------------------------------------------------------------------------------------------------------------------------------------------------------------------------------------------------------------------------------------------------------------------------------------------------------------------------------------------------------|
| #1 | ((((((((((((((((((((((((((((((((((((((((TS=(Dietary Fiber)) OR TS=( $\beta$ -glucan)) OR TS=(fiber)) OR TS=(Psyllium)) OR TS=(Konjac glucomannan)) OR TS=(Guar gum)) OR TS=(Xanthan gum)) OR TS=(Tamarind gum)) OR TS=(Pectin)) OR TS=(Sodium alginate)) OR TS=(Carrageenan)) OR TS=(Dietary Fibers)) OR TS=(Fibers, Dietary)) OR TS=(Fiber, Dietary)) OR TS=(Wheat Bran)) OR TS=(Brans, Wheat)) OR TS=(Bran, Wheat)) OR TS=(Wheat Brans)) OR TS=(Roughage)) OR TS=(Roughages)) OR TS=(soluble fibers)) OR TS=(Inulin)) OR TS=(FOS)) OR TS=(GOS)) OR TS=(IMO)) OR TS=(Agave)) OR TS=(Resistant dextrin)) OR TS=(Polydextrose)) OR TS=(Insoluble fibers)) OR TS=(Cellulose)) OR TS=(Hemicellulose)) OR TS=(Lignin)) OR TS=(Wheat bran fiber)) OR TS=(Composite fiber)) OR TS=(Whole wheat)) OR TS=(Resistant starches)) OR TS=(Resistant starch)) OR TS=(RS) |
| #2 | ((((((((TS=(constipation)) OR TS=(Irritable Bowel Syndromes)) OR TS=(Syndrome, Irritable Bowel)) OR TS=(Syndromes, Irritable Bowel)) OR TS=(Colitis, Mucous)) OR TS=(Colitides, Mucous)) OR TS=(Mucous Colitides)) OR TS=(Mucous Colitis)) OR TS=(Colon, Irritable)) OR TS=(Irritable Colon)) OR TS=(Colonic Inertia)) OR TS=(Dyschezia)                                                                                                                                                                                                                                                                                                                                                                                                                                                                                                                    |
| #3 | (((TS=(Randomized Controlled Trial)) OR TS=(Clinical Trials, Randomized)) OR TS=(Trials, Randomized Clinical)) OR TS=(Controlled Clinical Trials, Randomized)) OR TS=(randomized)                                                                                                                                                                                                                                                                                                                                                                                                                                                                                                                                                                                                                                                                           |
| #4 | #1 AND #2 AND #3                                                                                                                                                                                                                                                                                                                                                                                                                                                                                                                                                                                                                                                                                                                                                                                                                                            |

Table 1b. The retrieval used in Embase

|     |                                                                                                                                                                                                                                                                                                                                                                                                                                                                                                                                                                                                                                                                                                                                                                                                                                                                 |
|-----|-----------------------------------------------------------------------------------------------------------------------------------------------------------------------------------------------------------------------------------------------------------------------------------------------------------------------------------------------------------------------------------------------------------------------------------------------------------------------------------------------------------------------------------------------------------------------------------------------------------------------------------------------------------------------------------------------------------------------------------------------------------------------------------------------------------------------------------------------------------------|
| #1  | 'dietary fiber'/exp                                                                                                                                                                                                                                                                                                                                                                                                                                                                                                                                                                                                                                                                                                                                                                                                                                             |
| #2  | 'β-glucan':ab,ti OR 'fiber':ab,ti OR 'psyllium':ab,ti OR 'konjac glucomannan':ab,ti OR 'guar gum':ab,ti OR 'xanthan gum':ab,ti OR 'tamarind gum':ab,ti OR 'pectin':ab,ti OR 'sodium alginate':ab,ti OR 'carrageenan':ab,ti OR 'dietary fibers':ab,ti OR 'fibers, dietary':ab,ti OR 'fiber, dietary':ab,ti OR 'wheat bran':ab,ti OR 'brans, wheat':ab,ti OR 'bran, wheat':ab,ti OR 'wheat brans':ab,ti OR 'roughage':ab,ti OR 'roughages':ab,ti OR 'soluble fibers':ab,ti OR 'inulin':ab,ti OR 'fos':ab,ti OR 'gos':ab,ti OR 'imo':ab,ti OR 'agave':ab,ti OR 'resistant dextrin':ab,ti OR 'polydextrose':ab,ti OR 'insoluble fibers':ab,ti OR 'cellulose':ab,ti OR 'hemicellulose':ab,ti OR 'lignin':ab,ti OR 'wheat bran fiber':ab,ti OR 'composite fiber':ab,ti OR 'whole wheat':ab,ti OR 'resistant starches':ab,ti OR 'resistant starch':ab,ti OR 'rs':ab,ti |
| #3  | #1 OR #2                                                                                                                                                                                                                                                                                                                                                                                                                                                                                                                                                                                                                                                                                                                                                                                                                                                        |
| #4  | 'constipation'/exp                                                                                                                                                                                                                                                                                                                                                                                                                                                                                                                                                                                                                                                                                                                                                                                                                                              |
| #5  | 'β-glucan':ab,ti OR 'fiber':ab,ti OR 'psyllium':ab,ti OR 'konjac glucomannan':ab,ti OR 'guar gum':ab,ti OR 'xanthan gum':ab,ti OR 'tamarind gum':ab,ti OR 'pectin':ab,ti OR 'sodium alginate':ab,ti OR 'carrageenan':ab,ti OR 'dietary fibers':ab,ti OR 'fibers, dietary':ab,ti OR 'fiber, dietary':ab,ti OR 'wheat bran':ab,ti OR 'brans, wheat':ab,ti OR 'bran, wheat':ab,ti OR 'wheat brans':ab,ti OR 'roughage':ab,ti OR 'roughages':ab,ti OR 'soluble fibers':ab,ti OR 'inulin':ab,ti OR 'fos':ab,ti OR 'gos':ab,ti OR 'imo':ab,ti OR 'agave':ab,ti OR 'resistant dextrin':ab,ti OR 'polydextrose':ab,ti OR 'insoluble fibers':ab,ti OR 'cellulose':ab,ti OR 'hemicellulose':ab,ti OR 'lignin':ab,ti OR 'wheat bran fiber':ab,ti OR 'composite fiber':ab,ti OR 'whole wheat':ab,ti OR 'resistant starches':ab,ti OR 'resistant starch':ab,ti OR 'rs':ab,ti |
| #6  | #4 OR #5                                                                                                                                                                                                                                                                                                                                                                                                                                                                                                                                                                                                                                                                                                                                                                                                                                                        |
| #7  | 'randomized controlled trial'/exp                                                                                                                                                                                                                                                                                                                                                                                                                                                                                                                                                                                                                                                                                                                                                                                                                               |
| #8  | 'clinical trials, randomized':ab,ti OR 'trials, randomized clinical':ab,ti OR 'controlled clinical trials, randomized':ab,ti OR 'randomized':ab,ti                                                                                                                                                                                                                                                                                                                                                                                                                                                                                                                                                                                                                                                                                                              |
| #9  | #7 OR #8                                                                                                                                                                                                                                                                                                                                                                                                                                                                                                                                                                                                                                                                                                                                                                                                                                                        |
| #12 | #3 AND #6 AND #9                                                                                                                                                                                                                                                                                                                                                                                                                                                                                                                                                                                                                                                                                                                                                                                                                                                |

Table 1c. The retrieval used in Cochrane

|     |                                                                                                                                                                                                                                                                                                                                                                                                                                                                                                                                                                                                                                                                                                                                                                                                                                                                                                                                                         |
|-----|---------------------------------------------------------------------------------------------------------------------------------------------------------------------------------------------------------------------------------------------------------------------------------------------------------------------------------------------------------------------------------------------------------------------------------------------------------------------------------------------------------------------------------------------------------------------------------------------------------------------------------------------------------------------------------------------------------------------------------------------------------------------------------------------------------------------------------------------------------------------------------------------------------------------------------------------------------|
| #1  | MeSH descriptor: [Dietary Fiber] explode all trees                                                                                                                                                                                                                                                                                                                                                                                                                                                                                                                                                                                                                                                                                                                                                                                                                                                                                                      |
| #2  | MeSH descriptor: [Resistant Starch] explode all trees                                                                                                                                                                                                                                                                                                                                                                                                                                                                                                                                                                                                                                                                                                                                                                                                                                                                                                   |
| #3  | ( $\beta$ -glucan):ti,ab,kw OR (fiber):ti,ab,kw OR (Psyllium):ti,ab,kw OR (Konjac glucomannan):ti,ab,kw OR (Guar gum):ti,ab,kw OR (Xanthan gum):ti,ab,kw OR (Tamarind gum):ti,ab,kw OR (Pectin):ti,ab,kw OR (Sodium alginate):ti,ab,kw OR (Carrageenan):ti,ab,kw OR (Dietary Fibers):ti,ab,kw OR (Fibers, Dietary):ti,ab,kw OR (Fiber, Dietary):ti,ab,kw OR (Wheat Bran):ti,ab,kw OR (Brans, Wheat):ti,ab,kw OR (Bran, Wheat):ti,ab,kw OR (Wheat Brans):ti,ab,kw OR (Roughage):ti,ab,kw OR (Roughages):ti,ab,kw OR (soluble fibers):ti,ab,kw OR (Inulin):ti,ab,kw OR (FOS):ti,ab,kw OR (GOS):ti,ab,kw OR (IMO):ti,ab,kw OR (Agave):ti,ab,kw OR (Resistant dextrin):ti,ab,kw OR (Polydextrose):ti,ab,kw OR (Insoluble fibers):ti,ab,kw OR (Cellulose):ti,ab,kw OR (Hemicellulose):ti,ab,kw OR (Lignin):ti,ab,kw OR (Wheat bran fiber):ti,ab,kw OR (Composite fiber):ti,ab,kw OR (Whole wheat):ti,ab,kw OR (Resistant starches):ti,ab,kw OR (RS):ti,ab,kw |
| #4  | #1 OR #2 OR #3                                                                                                                                                                                                                                                                                                                                                                                                                                                                                                                                                                                                                                                                                                                                                                                                                                                                                                                                          |
| #5  | MeSH descriptor: [Constipation] explode all trees                                                                                                                                                                                                                                                                                                                                                                                                                                                                                                                                                                                                                                                                                                                                                                                                                                                                                                       |
| #6  | (Irritable Bowel Syndromes):ti,ab,kw OR (Syndrome, Irritable Bowel):ti,ab,kw OR (Syndromes, Irritable Bowel):ti,ab,kw OR (Colitis, Mucous):ti,ab,kw OR (Colitides, Mucous):ti,ab,kw OR (Mucous Colitides):ti,ab,kw OR (Mucous Colitis):ti,ab,kw OR (Colon, Irritable):ti,ab,kw OR (Irritable Colon):ti,ab,kw OR (Colonic Inertia):ti,ab,kw OR (Dyschezia):ti,ab,kw OR (IBS-C):ti,ab,kw                                                                                                                                                                                                                                                                                                                                                                                                                                                                                                                                                                  |
| #7  | #5 OR #6                                                                                                                                                                                                                                                                                                                                                                                                                                                                                                                                                                                                                                                                                                                                                                                                                                                                                                                                                |
| #8  | MeSH descriptor: [Randomized Controlled Trial] explode all trees                                                                                                                                                                                                                                                                                                                                                                                                                                                                                                                                                                                                                                                                                                                                                                                                                                                                                        |
| #9  | (Clinical Trials, Randomized):ti,ab,kw OR (Trials, Randomized Clinical):ti,ab,kw OR (Controlled Clinical Trials, Randomized):ti,ab,kw OR (Randomized):ti,ab,kw                                                                                                                                                                                                                                                                                                                                                                                                                                                                                                                                                                                                                                                                                                                                                                                          |
| #10 | #8 OR #9                                                                                                                                                                                                                                                                                                                                                                                                                                                                                                                                                                                                                                                                                                                                                                                                                                                                                                                                                |
| #11 | #4 AND #7 AND #10                                                                                                                                                                                                                                                                                                                                                                                                                                                                                                                                                                                                                                                                                                                                                                                                                                                                                                                                       |

Table 1d. The retrieval used in PUBmed

|     |                                                                                                                                                                                                                                                                                                                                                                                                                                                                                                                                                                                                                                                                                                                                                                                                                                                                                                                                                                                                                                                                                                                                                                                                                 |
|-----|-----------------------------------------------------------------------------------------------------------------------------------------------------------------------------------------------------------------------------------------------------------------------------------------------------------------------------------------------------------------------------------------------------------------------------------------------------------------------------------------------------------------------------------------------------------------------------------------------------------------------------------------------------------------------------------------------------------------------------------------------------------------------------------------------------------------------------------------------------------------------------------------------------------------------------------------------------------------------------------------------------------------------------------------------------------------------------------------------------------------------------------------------------------------------------------------------------------------|
| #1  | "Dietary Fiber"[Mesh] OR "beta-Glucans"[Mesh] OR "Resistant Starch"[Mesh]                                                                                                                                                                                                                                                                                                                                                                                                                                                                                                                                                                                                                                                                                                                                                                                                                                                                                                                                                                                                                                                                                                                                       |
| #2  | (((((((((((((((((((((((((((((((((((((fiber[Title/Abstract]) OR (Psyllium[Title/Abstract])) OR (Konjac glucomannan[Title/Abstract])) OR (Guar gum[Title/Abstract])) OR (Xanthan gum[Title/Abstract])) OR (Tamarind gum[Title/Abstract])) OR (Pectin[Title/Abstract])) OR (Sodium alginate[Title/Abstract])) OR (Carrageenan[Title/Abstract])) OR (Dietary Fibers[Title/Abstract])) OR (Fibers, Dietary[Title/Abstract])) OR (Fiber, Dietary[Title/Abstract])) OR (Wheat Bran[Title/Abstract])) OR (Brans, Wheat[Title/Abstract])) OR (Bran, Wheat[Title/Abstract])) OR (Wheat Brans[Title/Abstract])) OR (Roughage[Title/Abstract])) OR (soluble fibers[Title/Abstract])) OR (Inulin[Title/Abstract])) OR (FOS[Title/Abstract])) OR (GOS[Title/Abstract])) OR (IMO[Title/Abstract])) OR (Agave[Title/Abstract])) OR (Resistant dextrin[Title/Abstract])) OR (Polydextrose[Title/Abstract])) OR (Insoluble fibers[Title/Abstract])) OR (Cellulose[Title/Abstract])) OR (Hemicellulose[Title/Abstract])) OR (Lignin[Title/Abstract])) OR (Wheat bran fiber[Title/Abstract])) OR (Composite fiber[Title/Abstract])) OR (Whole wheat[Title/Abstract])) OR (Resistant starch[Title/Abstract])) OR (RS[Title/Abstract] |
| #3  | #1 OR #2                                                                                                                                                                                                                                                                                                                                                                                                                                                                                                                                                                                                                                                                                                                                                                                                                                                                                                                                                                                                                                                                                                                                                                                                        |
| #4  | ("Constipation"[Mesh] OR "Irritable Bowel Syndrome"[Mesh]                                                                                                                                                                                                                                                                                                                                                                                                                                                                                                                                                                                                                                                                                                                                                                                                                                                                                                                                                                                                                                                                                                                                                       |
| #5  | ((((((((((((Irritable Bowel Syndromes[Title/Abstract]) OR (Syndrome, Irritable Bowel[Title/Abstract])) OR (IBS-C[Title/Abstract])) OR (Colitis, Mucous[Title/Abstract])) OR (Colitides, Mucous[Title/Abstract])) OR (Mucous Colitides[Title/Abstract])) OR (Mucous Colitis[Title/Abstract])) OR (Colon, Irritable[Title/Abstract])) OR (Irritable Colon[Title/Abstract])) OR (Colonic Inertia[Title/Abstract])) OR (Dyschezia[Title/Abstract]                                                                                                                                                                                                                                                                                                                                                                                                                                                                                                                                                                                                                                                                                                                                                                   |
| #6  | #4 OR #5                                                                                                                                                                                                                                                                                                                                                                                                                                                                                                                                                                                                                                                                                                                                                                                                                                                                                                                                                                                                                                                                                                                                                                                                        |
| #7  | ("Randomized Controlled Trial" [Publication Type]) OR "Randomized Controlled Trials as Topic"[Mesh]                                                                                                                                                                                                                                                                                                                                                                                                                                                                                                                                                                                                                                                                                                                                                                                                                                                                                                                                                                                                                                                                                                             |
| #8  | ((Clinical Trials, Randomized[Title/Abstract]) OR (Trials, Randomized Clinical[Title/Abstract])) OR (Controlled Clinical Trials, Randomized[Title/Abstract])) OR (randomized[Title/Abstract])                                                                                                                                                                                                                                                                                                                                                                                                                                                                                                                                                                                                                                                                                                                                                                                                                                                                                                                                                                                                                   |
| #9  | #7 OR #8                                                                                                                                                                                                                                                                                                                                                                                                                                                                                                                                                                                                                                                                                                                                                                                                                                                                                                                                                                                                                                                                                                                                                                                                        |
| #10 | #3 AND #6 AND #9                                                                                                                                                                                                                                                                                                                                                                                                                                                                                                                                                                                                                                                                                                                                                                                                                                                                                                                                                                                                                                                                                                                                                                                                |

**Supplementary Table 2 : Characteristics of the included RCTs**

| Author, year                      | Design        | Subtype | Sample size | Mean age (years) | Female (%) | Diagnostic criteria | Intervention                                           | contrast                   | Treatment duration (days) | Outcomes                                                                  |
|-----------------------------------|---------------|---------|-------------|------------------|------------|---------------------|--------------------------------------------------------|----------------------------|---------------------------|---------------------------------------------------------------------------|
| Lin Xu, 2014                      | Single center | STC     | 80          | 43.8             | 61.3%      | Rome III            | Pectin (Viscous soluble fiber)                         | Placebo                    | 28                        | Constipation symptom score, Straining, Stool Consistency, Stool Frequency |
| Xiucui Fang, 2017                 | Multicenter   | FC      | 122         | 69.4             | 52.5%      | Rome III            | Testa triticum tricum purif (Insoluble fiber)          | PEG4000                    | 56                        | Constipation symptom score, Adverse reaction                              |
| Çağlar Akçalı, 2025               | Single center | IBS-C   | 34          | 38.3             | 76.4%      | Rome IV             | Inulin/oligofructose mixture (Prebiotic soluble fiber) | Placebo                    | 56                        | IBS-SSS                                                                   |
| Lonneke JanssenDuijghuijsen, 2024 | Single center | IBS-C   | 176         | 37.2             | 88.6%      | Rome IV             | Acacia fiber supplement (Prebiotic soluble fiber)      | probiotic BLa80/ Placebo   | 28                        | IBS-SSS, Stool Consistency, Stool Frequency                               |
| Enrique Coss-Adame, 2024          | Single center | FC      | 40          | 34.8             | 85.0%      | Rome III            | Agave tequilana Fructans (Prebiotic soluble fiber)     | Psyllium plantago (Viscous | 56                        | Adverse reaction, SBM                                                     |

|                       |               |    |     |      |       |          |                                                                                                                              |                       |    |                                                                                             |
|-----------------------|---------------|----|-----|------|-------|----------|------------------------------------------------------------------------------------------------------------------------------|-----------------------|----|---------------------------------------------------------------------------------------------|
|                       |               |    |     |      |       |          |                                                                                                                              | soluble<br>fiber)     |    |                                                                                             |
| Kankona Dey, 2023     | Single center | FC | 35  | -    | 74.4% | Rome IV  | Galactooligosaccharide (Prebiotic soluble fiber)                                                                             | Placebo               | 30 | Constipation symptom score, Straining, Stool Consistency, Stool Frequency, Adverse reaction |
| Tuen-Ching Chan, 2022 | Single center | FC | 52  | 83.9 | 62.0% | Rome III | Partially hydrolyzed guar gum (Prebiotic soluble fiber)                                                                      | Placebo               | 28 | Stool Consistency, Stool Frequency, Adverse reaction                                        |
| Hao Lai, 2023         | Single center | FC | 250 | 44.5 | 77.2% | Rome IV  | Polydextrose (Prebiotic soluble fiber), psyllium husk (Viscous soluble fiber), wheat bran + psyllium husk (Composite fibers) | Probiotic/<br>Placebo | 28 | Stool Consistency, Stool Frequency, Straining, Adverse reaction,                            |
| Yuping Zhu, 2025      | Single center | FC | 48  | 22.3 | 0%    | Rome IV  | Konjac glucomanna (Viscous soluble fiber)                                                                                    | Placebo               | 56 | PAC-SYM, Stool Consistency, Stool Frequency, Adverse                                        |

|                        |               |    |     |      |       |          |                                                                    |                                      |    |                                                                 |
|------------------------|---------------|----|-----|------|-------|----------|--------------------------------------------------------------------|--------------------------------------|----|-----------------------------------------------------------------|
|                        |               |    |     |      |       |          |                                                                    |                                      |    | reaction                                                        |
| Mingjun Chen, 2021     | Multicenter   | FC | 113 | 53.7 | 85.8% | Rome IV  | Compound fructose-oligosaccharide fiber granule (Composite fibers) | Placebo                              | 14 | Straining, Stool Consistency, Stool Frequency                   |
| Jae-Hwan Lee, 2024     | Single center | FC | 63  | 35.6 | 85.7% | Rome IV  | Galacto-oligosaccharide (Prebiotic soluble fiber)                  | Placebo                              | 28 | Stool Consistency, Stool Frequency, Straining, Adverse reaction |
| Elizabeth Steels, 2023 | Single center | FC | 61  | 37.0 | 80.3% | Rome IV  | Prebiotic powder formulation (Composite fibers)                    | acacia gum (Prebiotic soluble fiber) | 21 | PAC-SYM, Straining, Stool Consistency, Stool Frequency          |
| Alvin Ibarra, 2019     | Single center | FC | 96  | 43.3 | 70.0% | Rome III | Polydextrose (Prebiotic soluble fiber)                             | Placebo                              | 14 | PAC-SYM, Straining, Stool Consistency, Stool Frequency          |
| Sirirat Luk-In, 2024   | Single center | CC | 87  | 40.3 | 86.2% | Rome IV  | Resistant starch type 3 (Resistant starches)                       | Placebo                              | 84 | Constipation Scoring System, Stool Consistency                  |

|                            |               |    |    |      |       |          |                                                   |                                  |    |                                                               |
|----------------------------|---------------|----|----|------|-------|----------|---------------------------------------------------|----------------------------------|----|---------------------------------------------------------------|
| Marieke H Schoemaker, 2022 | Single center | FC | 87 | 38.0 | 92.0% | Rome IV  | Galacto-oligosaccharide (Prebiotic soluble fiber) | Placebo                          | 21 | PAC-SYM, Stool Consistency, Stool Frequency                   |
| Askin Erdogan, 2016        | Single center | FC | 72 | 42.9 | 91.7% | Rome III | Mixed fiber (Composite fibers)                    | Psyllium (Viscous soluble fiber) | 28 | Straining, Stool Consistency, Stool Frequency                 |
| Peter I Duncan, 2018       | Single center | FC | 79 | 39.0 | 92.4% | Rome III | Polydextrose Fiber (Prebiotic soluble fiber)      | Placebo                          | 28 | PAC-SYM, Stool Consistency, Stool Frequency, Adverse reaction |

STC, slow-transit constipation. FC, functional constipation. IBS-C, Constipation-predominant irritable bowel syndrome. CC, chronic constipation. CTT, colonic transit time.

WGTT, whole gut transit time. PAC-SYM, Patient Assessment of Constipation Symptom.

**Supplementary Table 3: Certainty of Evidence**

| Outcome                     | Comparison                                       | Effect Estimate SMD (95% CI) | Crosses Null Line? | Risk of Bias | Inconsistency      | Indirectness       | Imprecision        | GRADE Rating |
|-----------------------------|--------------------------------------------------|------------------------------|--------------------|--------------|--------------------|--------------------|--------------------|--------------|
| Stool consistency           | Viscous soluble fiber VS Placebo                 | -0.53 (-1.0, -0.02)          | No                 | No           | Downgraded 1 level | No                 | No                 | Moderate     |
|                             | Viscous soluble fiber VS Prebiotic soluble fiber | -0.32 (-0.9, 0.26)           | Yes                | No           | Downgraded 1 level | No                 | Downgraded 1 level | Low          |
|                             | Viscous soluble fiber VS Resistant starches      | -0.29 (-1.42, 0.83)          | Yes                | No           | Downgraded 1 level | Downgraded 1 level | Downgraded 1 level | Very Low     |
|                             | Viscous soluble fiber VS Composite fibers        | -0.22 (-0.83, 0.39)          | Yes                | No           | Downgraded 1 level | No                 | Downgraded 1 level | Low          |
| Stool frequency             | Viscous soluble fiber VS Placebo                 | -1.11 (-2.07, -0.18)         | No                 | No           | Downgraded 1 level | No                 | No                 | Moderate     |
|                             | Viscous soluble fiber VS Prebiotic soluble fiber | -0.58 (-1.58, 0.4)           | Yes                | No           | Downgraded 1 level | No                 | Downgraded 1 level | Low          |
|                             | Viscous soluble fiber VS Composite fibers        | -0.1 (-1.23, 1.03)           | Yes                | No           | Downgraded 1 level | No                 | Downgraded 1 level | Low          |
| Straining during defecation | Viscous soluble fiber VS Placebo                 | -0.70 (-1.32, -0.13)         | No                 | No           | No                 | No                 | No                 | High         |

|                            |                                                  |                      |     |    |                    |                    |                    |          |
|----------------------------|--------------------------------------------------|----------------------|-----|----|--------------------|--------------------|--------------------|----------|
|                            | Composite fibers VS Placebo                      | -0.52 (-1.10, -0.01) | No  | No | No                 | No                 | No                 | High     |
|                            | Viscous soluble fiber VS Prebiotic soluble fiber | -0.37 (-1.01, 0.29)  | Yes | No | No                 | No                 | Downgraded 1 level | Moderate |
|                            | Viscous soluble fiber VS Composite fibers        | -0.18 (-0.78, 0.43)  | Yes | No | No                 | No                 | Downgraded 1 level | Moderate |
| Constipation symptom score | Insoluble fiber VS Viscous soluble fiber         | -1.64 (-5.5, 2.21)   | Yes | No | Downgraded 1 level | Downgraded 1 level | Downgraded 1 level | Very Low |
|                            | Insoluble fiber VS Prebiotic soluble fiber       | -2.2 (-5.61, 1.2)    | Yes | No | Downgraded 1 level | Downgraded 1 level | Downgraded 1 level | Very Low |
|                            | Insoluble fiber VS Resistant starches            | -2.92 (-7.22, 1.31)  | Yes | No | Downgraded 1 level | Downgraded 1 level | Downgraded 1 level | Very Low |
|                            | Insoluble fiber VS Composite fibers              | -1.27 (-5.53, 3)     | Yes | No | Downgraded 1 level | Downgraded 1 level | Downgraded 1 level | Very Low |
| Adverse event              | Viscous soluble fiber VS Prebiotic soluble fiber | 1.63 (0.58, 4.78)    | Yes | No | No                 | No                 | Downgraded 1 level | Moderate |
|                            | Viscous soluble fiber VS Insoluble fiber         | 10.01 (0.59, 628.65) | Yes | No | No                 | Downgraded 1 level | Downgraded 1 level | Low      |
|                            | Viscous soluble fiber VS                         | 1.49 (0.33, 6.8)     | Yes | No | No                 | No                 | Downgrade          | Moderate |

|  |                  |  |  |  |  |  |           |  |
|--|------------------|--|--|--|--|--|-----------|--|
|  | Composite fibers |  |  |  |  |  | d 1 level |  |
|--|------------------|--|--|--|--|--|-----------|--|

Supplementary Figure 1: ROB 2 bias risk assessment results

| Study ID                          | Experimental                                           | Comparator               | D1 | D2 | D3 | D4 | D5 | Overall |                                               |
|-----------------------------------|--------------------------------------------------------|--------------------------|----|----|----|----|----|---------|-----------------------------------------------|
| Lin Xu, 2014                      | Pectin                                                 | Placebo                  | +  | +  | +  | +  | +  | +       | Low risk                                      |
| Xiucui Fang, 2017                 | Testa triticum tricum purif                            | PEG4000                  | +  | +  | +  | +  | +  | +       | Some concerns                                 |
| Çağlar Akçalı, 2025               | Inulin/oligofructose mixture                           | Placebo                  | +  | +  | +  | +  | +  | +       | High risk                                     |
| Lonneke JanssenDuijghuijsen, 2024 | Acacia fiber supplement                                | probiotic BLa80/ Placebo | +  | +  | +  | +  | +  | +       |                                               |
| Enrique Coss-Adame, 2024          | Agave tequilana Fructans                               | Psyllium plantago        | +  | +  | +  | +  | +  | +       | D1 Randomisation process                      |
| Kankona Dey, 2023                 | Galactooligosaccharide                                 | Placebo                  | +  | +  | +  | +  | +  | +       | D2 Deviations from the intended interventions |
| Tuen-Ching Chan, 2022             | Partially hydrolyzed guar gum                          | Placebo                  | +  | +  | +  | +  | +  | +       | D3 Missing outcome data                       |
| Hao Lai, 2023                     | Polydextrose, psyllium husk, wheat bran +psyllium husk | Probiotic/ Placebo       | !  | +  | +  | +  | +  | !       | D4 Measurement of the outcome                 |
| Yuping Zhu, 2025                  | Konjac glucomanna                                      | Placebo                  | +  | +  | +  | +  | +  | +       | D5 Selection of the reported result           |
| Lonneke Mingjun Chen, 2021        | Compound fructose-oligosaccharide fiber granule        | Placebo                  | +  | +  | +  | +  | +  | +       |                                               |
| Jae-Hwan Lee, 2024                | Galacto-oligosaccharide                                | Placebo                  | !  | +  | +  | +  | +  | !       |                                               |
| Elizabeth Steels, 2023            | Prebiotic powder formulation                           | acacia gum               | +  | +  | +  | !  | +  | !       |                                               |
| Alvin Ibarra, 2019                | Polydextrose                                           | Placebo                  | +  | +  | +  | +  | +  | +       |                                               |
| Sirirat Luk-In, 2024              | Resistant starch type 3                                | Placebo                  | !  | +  | +  | +  | !  | !       |                                               |
| Marieke H Schoemaker, 2022        | Galacto-oligosaccharide                                | Placebo                  | +  | +  | +  | +  | +  | +       |                                               |
| Askin Erdogan, 2016               | Mixed fiber                                            | Psyllium                 | +  | +  | +  | +  | +  | +       |                                               |
| Peter I Duncan, 2018              | Polydextrose Fiber                                     | Placebo                  | +  | +  | +  | +  | +  | +       |                                               |



As percentage (intention-to-treat)

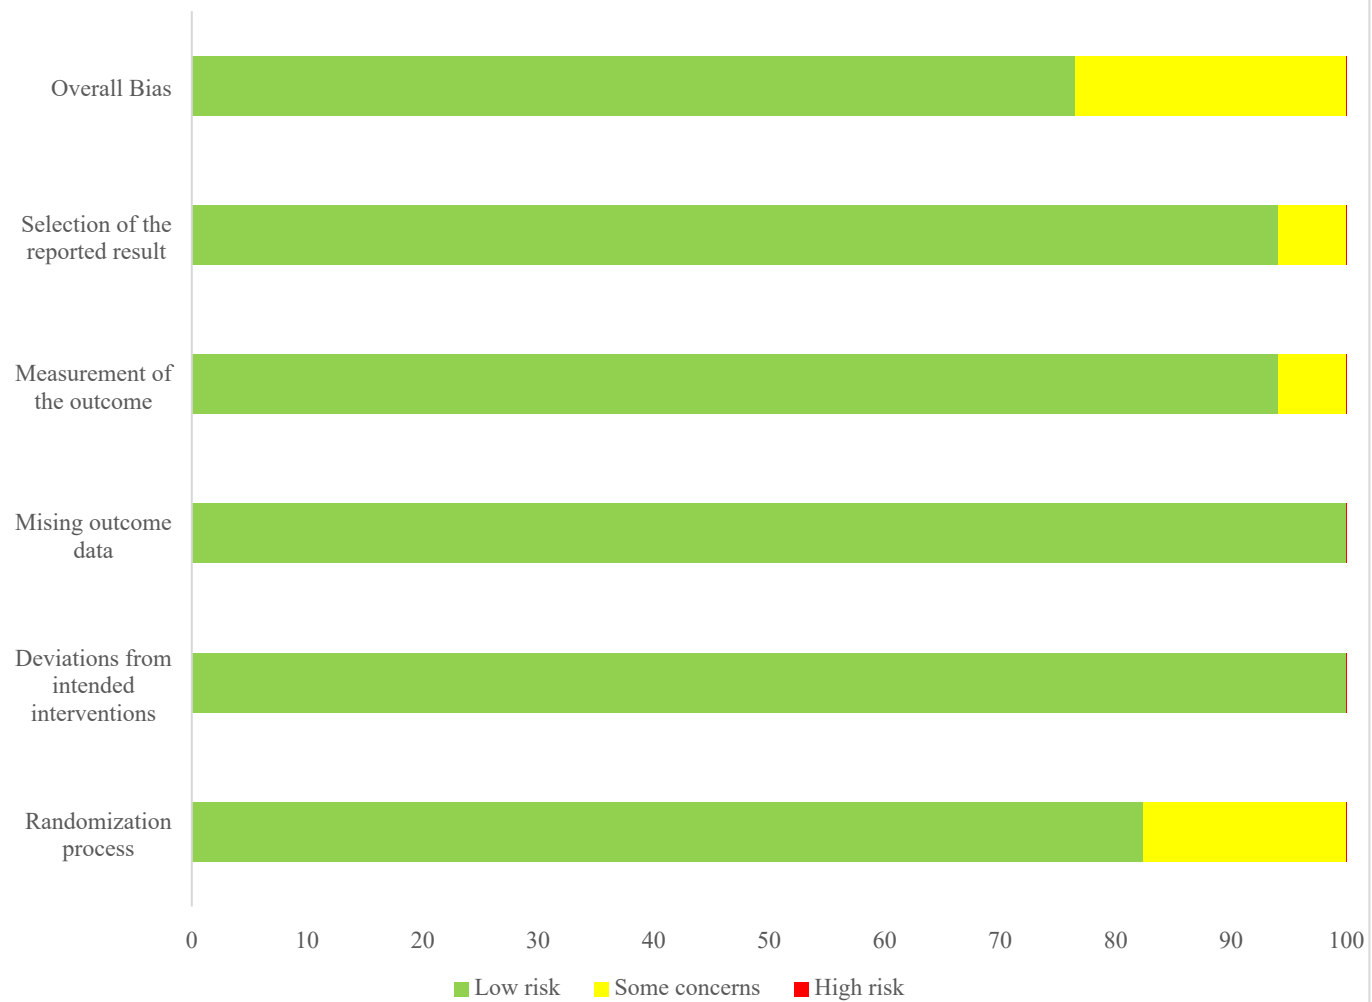

**Supplementary Figure 2a: Trace plots and density plots of Markov**

**chains on  
Stool  
consistenc  
y**

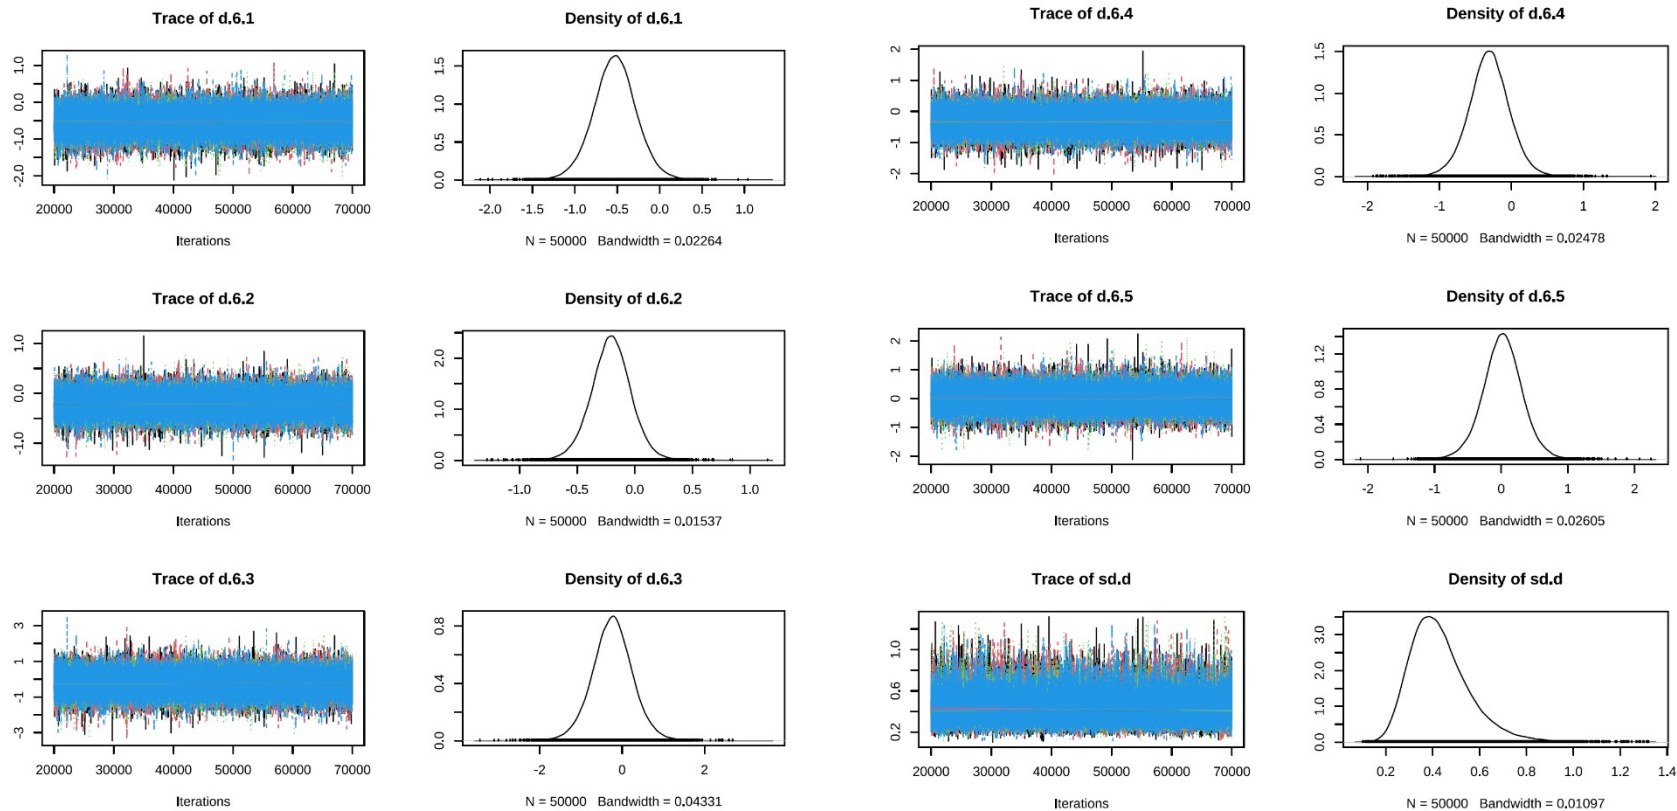

Ps: Trace plots and Density plots for key treatment comparisons are shown. The labels d.x.y represent the relative effect estimate (d) between intervention x and intervention y. The interventions are coded as follows: 1, "Viscous soluble fiber"; 2, "Prebiotic soluble fiber"; 3, "Resistant starches"; 4, Composite fibers"; 5 "Medicine "; 6 "Placebo".

**Figure 2b:**  
**heterogeneity**

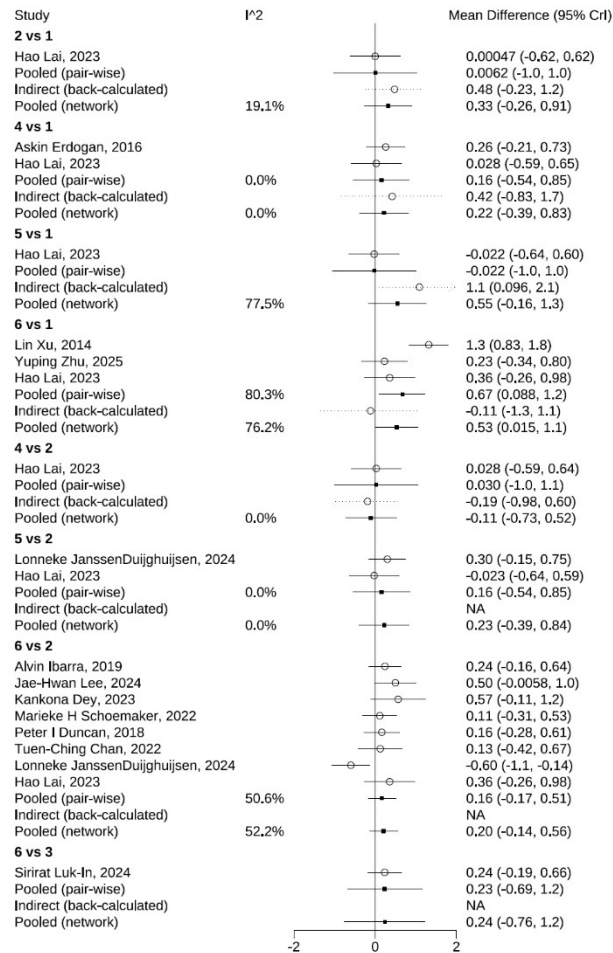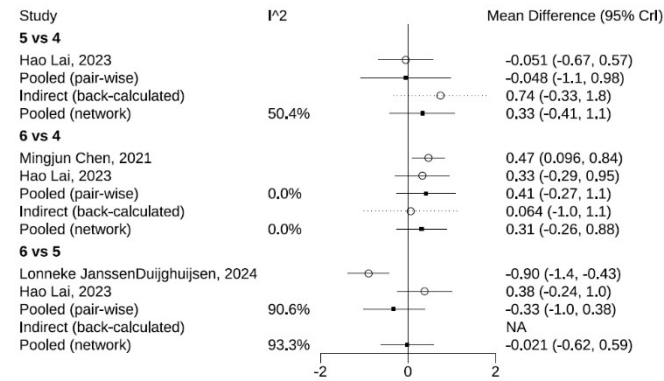

**Supplementary**  
**Forest plot of**  
**on Stool consistency**

Ps: 1, "Viscous soluble fiber"; 2, "Prebiotic soluble fiber"; 3, "Resistant starches"; 4, Composite fibers"; 5 "Medicine "; 6 "Placebo".

Supplementary Figure 3

3a. Network Diagram of the Effects of Dietary Fibers on Stool frequency

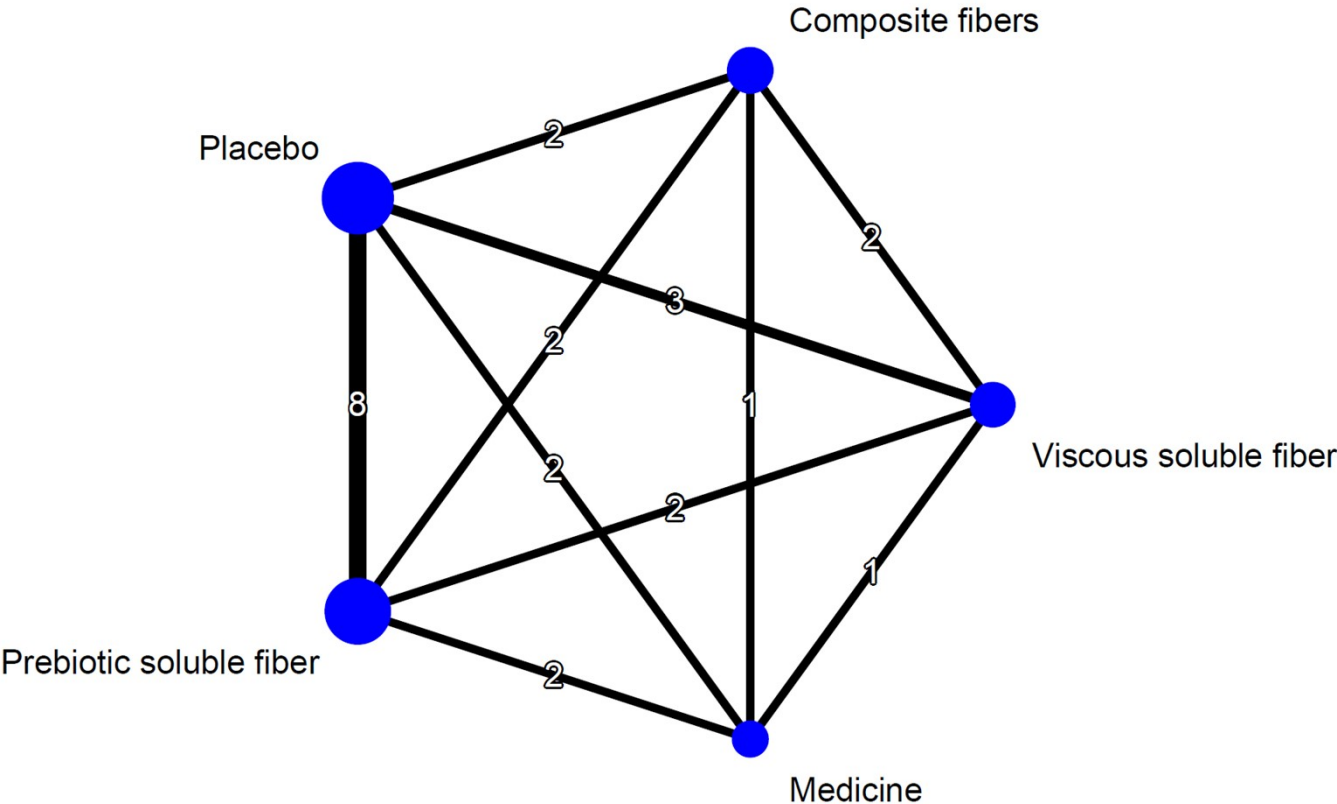

Ps. Blue circle sizes proportional to participant numbers in each intervention, and line thickness representing direct studies comparing two interventions.

**3b. Trace plots and density plots of Markov chains on Stool frequency**

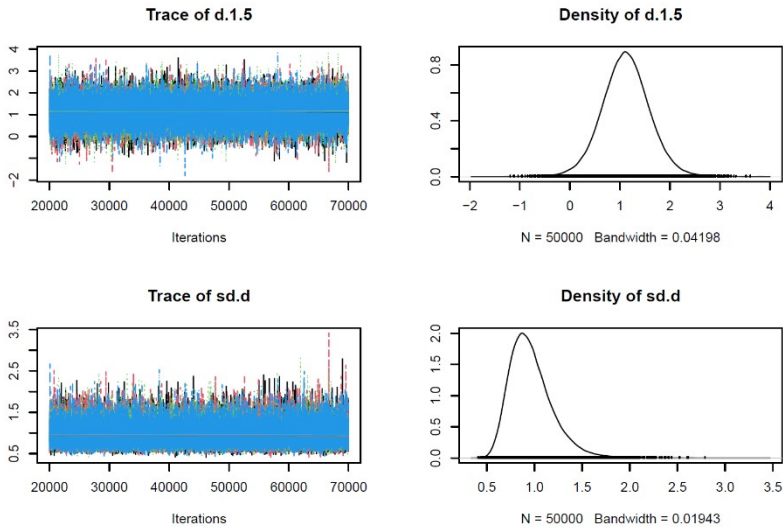

### 3c. Forest Plot for studies on Stool frequency

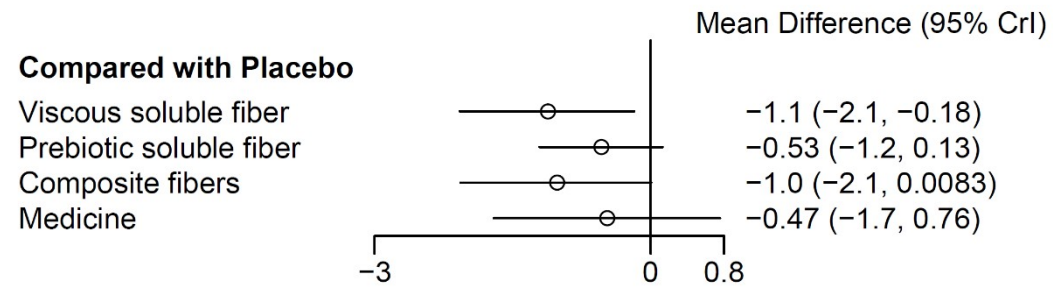

Ps: The interventions are coded as follows: 1, "Viscous soluble fiber"; 2, "Prebiotic soluble fiber"; 3, "Composite fibers"; 4 "Medicine "; 5 "Placebo".

### 3d. League table for studies on Stool frequency

| Viscous soluble fiber |  | Prebiotic soluble fiber |  | Composite fibers    |  | Medicine           |  | Placebo |  |
|-----------------------|--|-------------------------|--|---------------------|--|--------------------|--|---------|--|
| -0.58 (-1.58, 0.4)    |  | 0.48 (-0.57, 1.54)      |  |                     |  |                    |  |         |  |
| -0.1 (-1.23, 1.03)    |  |                         |  |                     |  |                    |  |         |  |
| -0.64 (-2.04, 0.74)   |  | -0.06 (-1.3, 1.17)      |  | -0.54 (-1.99, 0.87) |  |                    |  |         |  |
| -1.11 (-2.07, -0.18)  |  | -0.53 (-1.21, 0.13)     |  | -1.02 (-2.07, 0.01) |  | -0.47 (-1.7, 0.76) |  |         |  |

### 3e. Heterogeneous forest plot for studies on Stool frequency

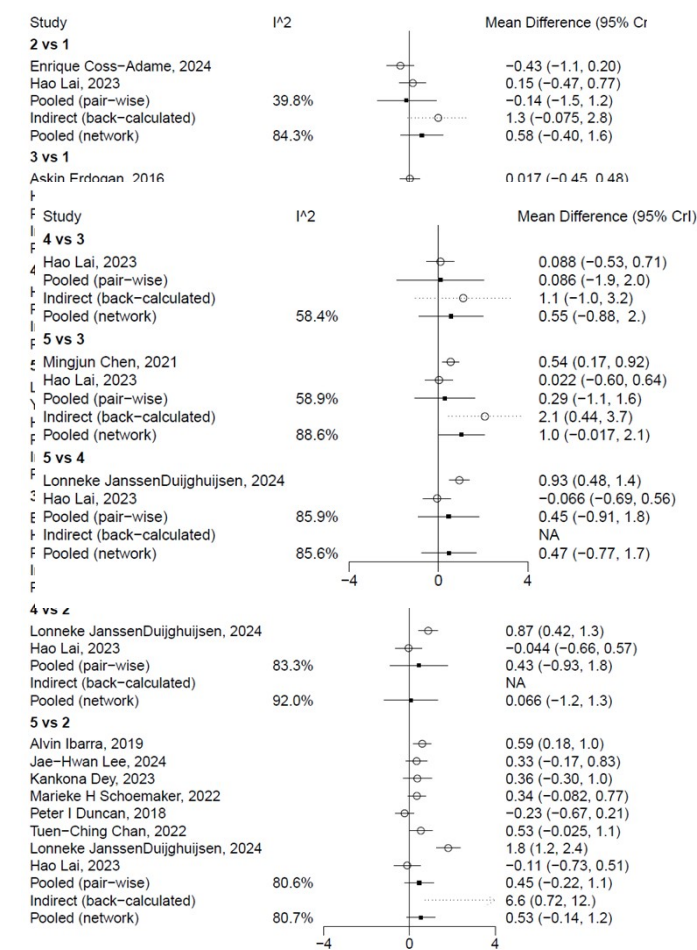

Ps: The interventions are coded as follows: 1, "Viscous soluble fiber"; 2, "Prebiotic soluble fiber"; 3, Composite fibers"; 4 "Medicine "; 5 "Placebo".

### 3f. Funnel plot of publication bias for studies on Stool frequency

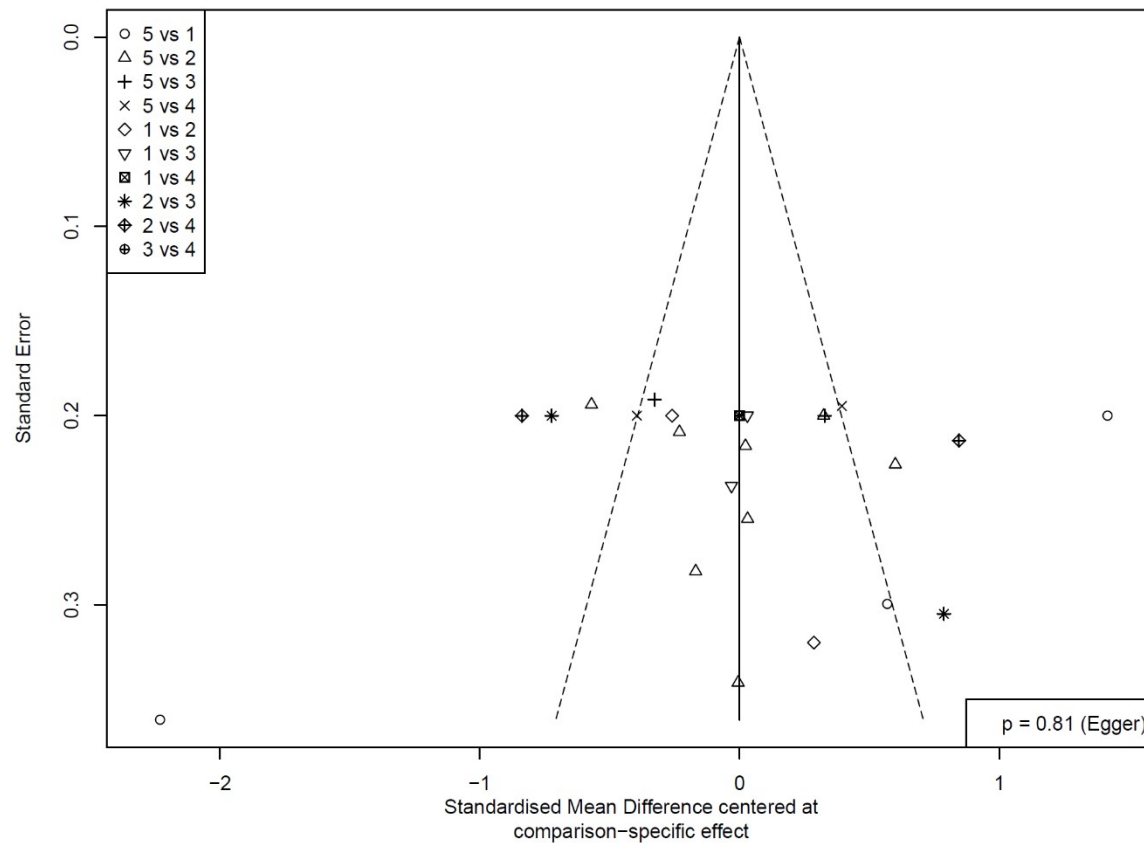

Ps: The interventions are coded as follows: 1, "Viscous soluble fiber"; 2, "Prebiotic soluble fiber"; 3, Composite fibers"; 4 "Medicine "; 5 "Placebo".

**Supplementary Figure 4**

### 4a. Network Diagram of the Effects of Dietary Fibers on Defecatory difficulty

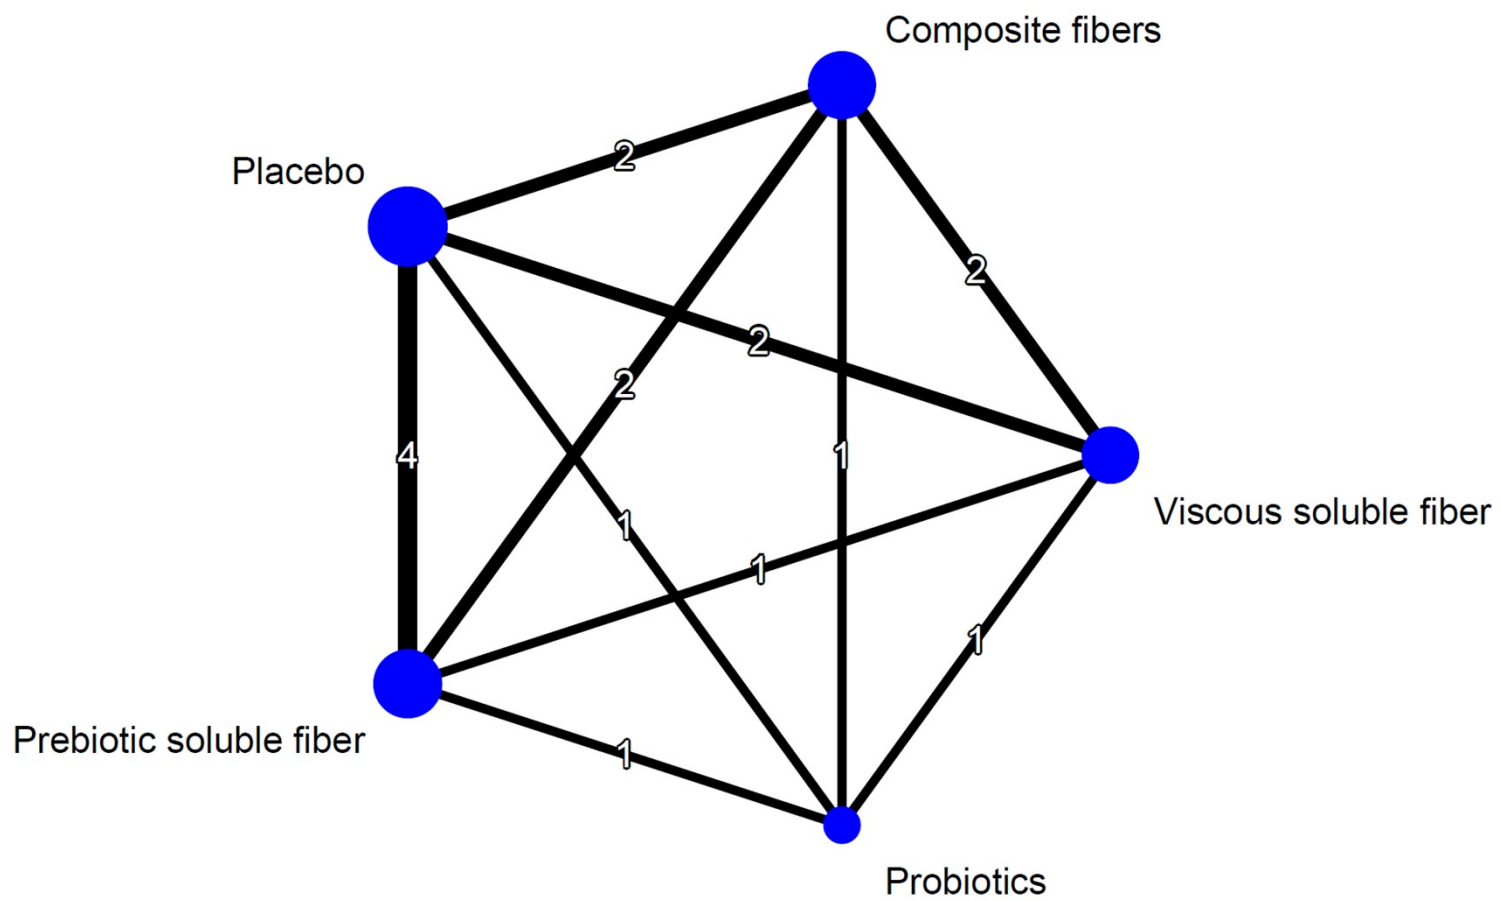

4b. Trace plots and density plots of Markov chains in Defecatory difficulty

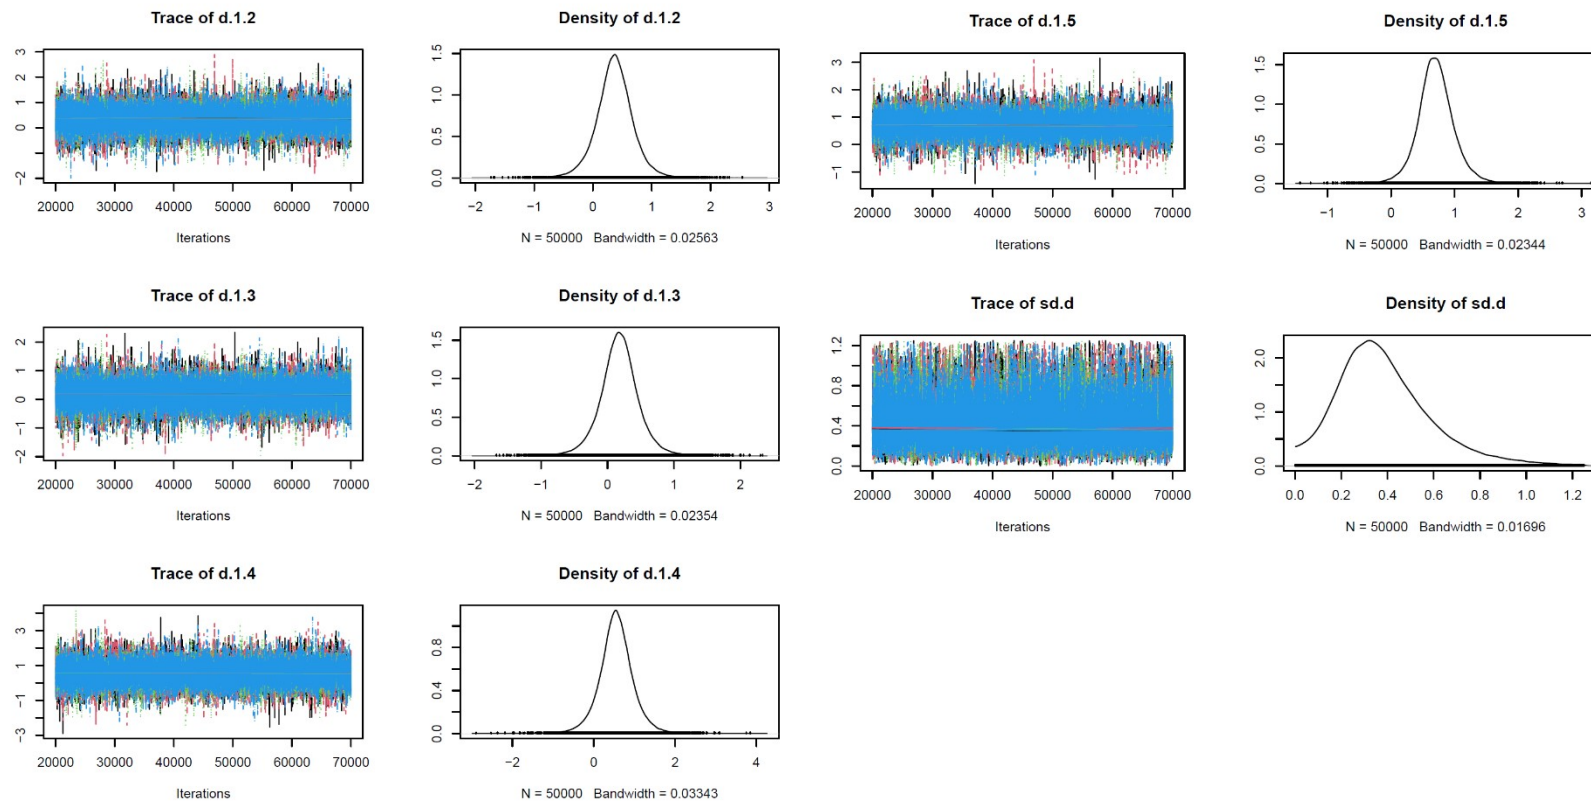

Ps: The interventions are coded as follows: 1, "Viscous soluble fiber"; 2, "Prebiotic soluble fiber"; 3, Composite fibers"; 4 "Medicine "; 5 "Placebo".

4c. Forest Plot for studies on Defecatory difficulty

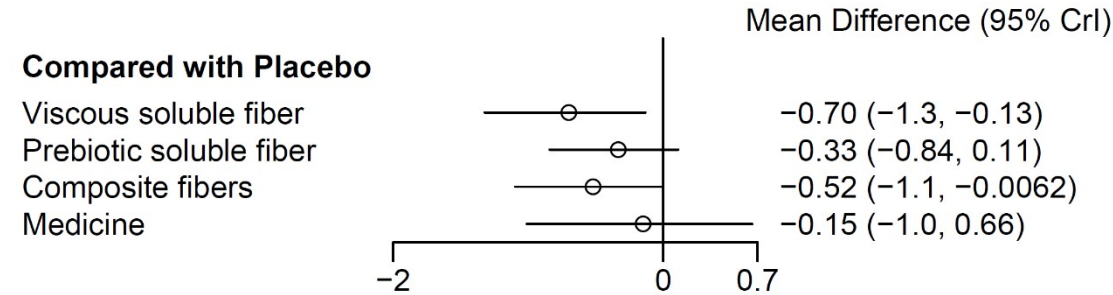

4d. League table for studies on Defecatory difficulty

|                       |                         |                     |                     |         |  |
|-----------------------|-------------------------|---------------------|---------------------|---------|--|
| Viscous soluble fiber |                         |                     |                     |         |  |
| -0.37 (-1.01, 0.29)   | Prebiotic soluble fiber |                     |                     |         |  |
| -0.18 (-0.78, 0.43)   | 0.19 (-0.39, 0.76)      | Composite fibers    |                     |         |  |
| -0.55 (-1.42, 0.32)   | -0.18 (-1.04, 0.66)     | -0.37 (-1.23, 0.47) | Medicine            |         |  |
| -0.7 (-1.32, -0.13)   | -0.33 (-0.84, 0.11)     | -0.52 (-1.1, -0.01) | -0.15 (-1.01, 0.66) | Placebo |  |

#### 4e. Heterogeneous forest plot for studies on Defecatory difficulty

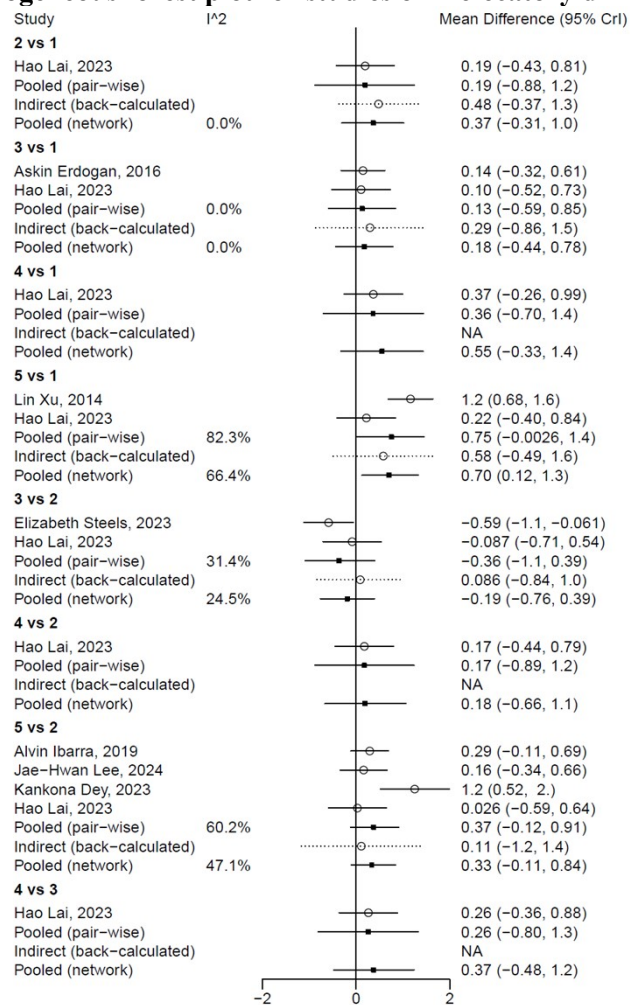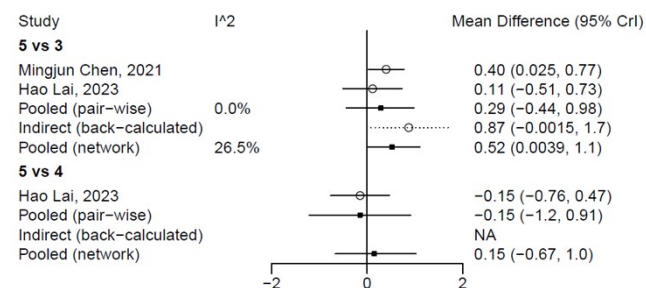

Ps: The interventions are coded as follows: 1, "Viscous soluble fiber"; 2, "Prebiotic soluble fiber"; 3,Composite fibers"; 4 "Medicine "; 5 "Placebo".

Supplementary Figure 5

5a.Network Diagram of the Effects of Dietary Interventions on Constipation symptom score

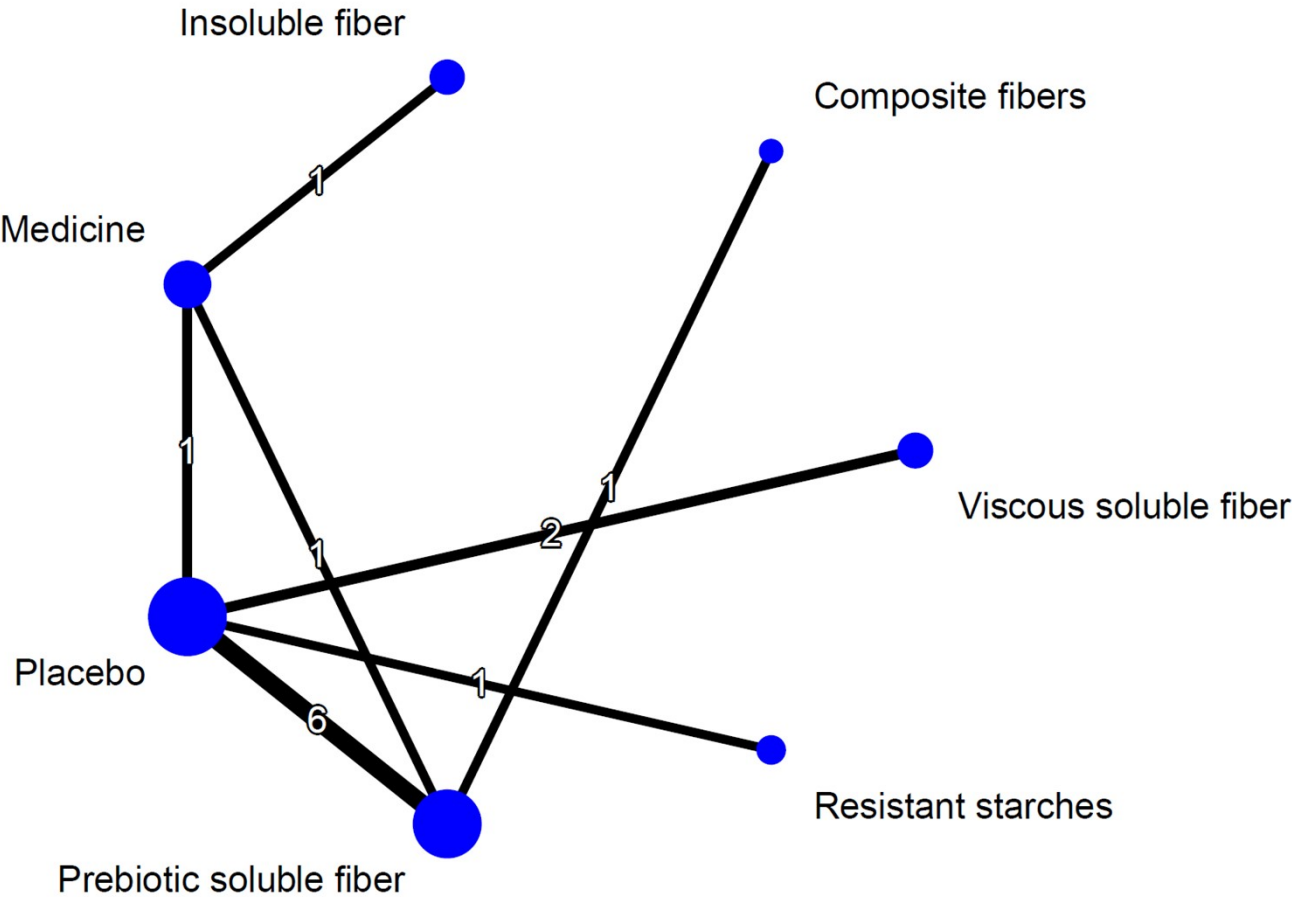

## 5b. Trace plots and density plots of Markov chains on Constipation symptom score

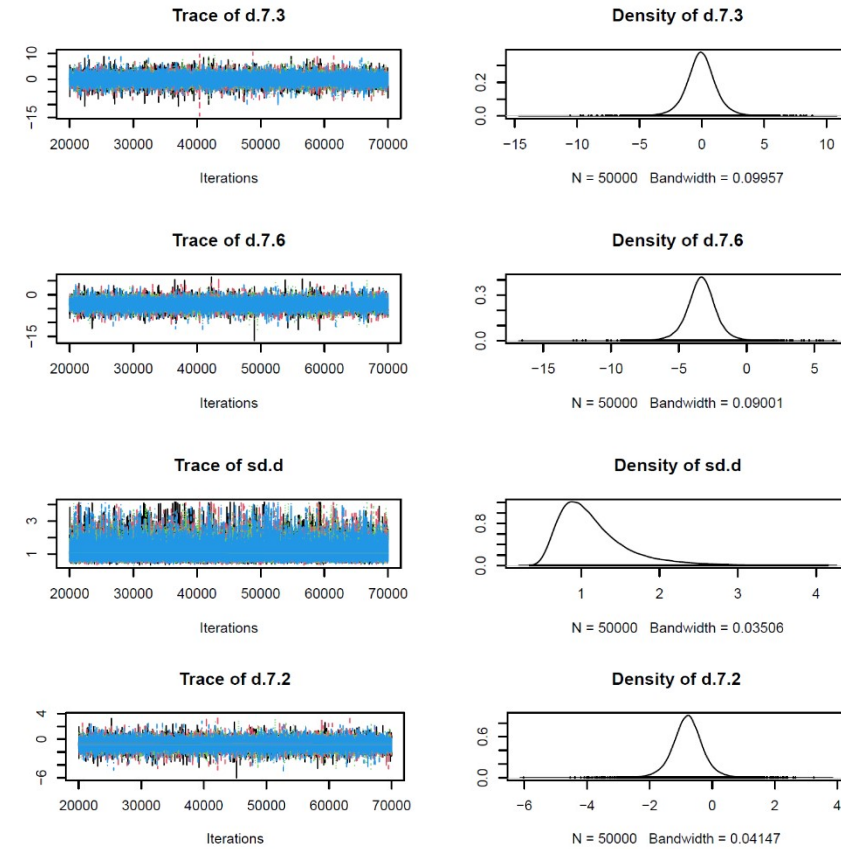

Ps: The interventions are coded as follows: 1, "Viscous soluble fiber"; 2, "Prebiotic soluble fiber"; 3, "Resistant starches"; 4, "Insoluble fiber"; 5, "Composite fibers"; 6, "Medicine "; 7, "Placebo".

### 5c. Forest Plot for studies on Constipation symptom score

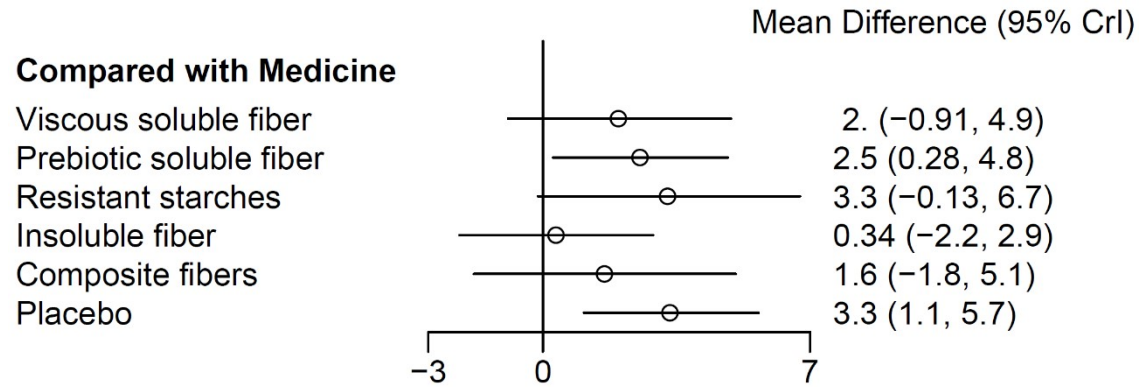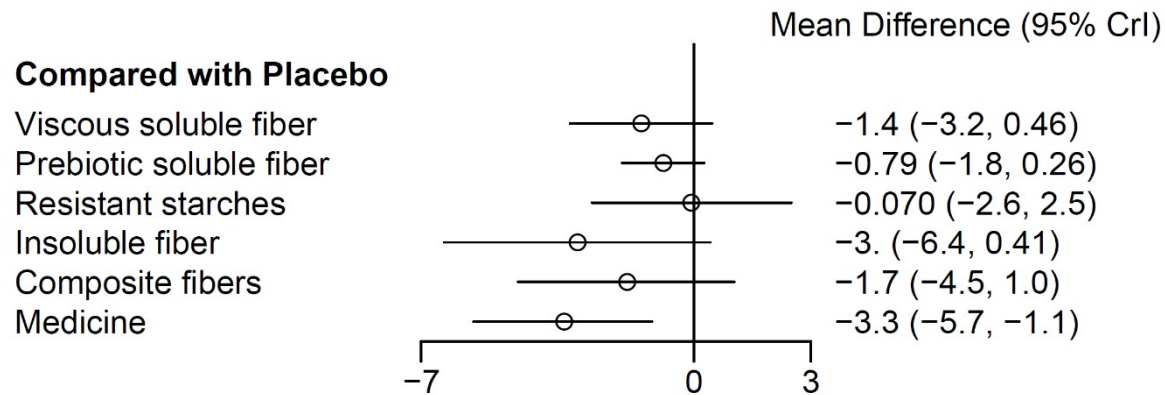

#### 5d. League table for studies on Constipation symptom score

|                       |                         |                    |                     |                     |                      |         |  |  |  |  |  |  |
|-----------------------|-------------------------|--------------------|---------------------|---------------------|----------------------|---------|--|--|--|--|--|--|
| Viscous soluble fiber |                         |                    |                     |                     |                      |         |  |  |  |  |  |  |
| -0.57 (-2.67, 1.54)   | Prebiotic soluble fiber |                    |                     |                     |                      |         |  |  |  |  |  |  |
| -1.28 (-4.43, 1.85)   | -0.72 (-3.5, 2.03)      | Resistant starches |                     |                     |                      |         |  |  |  |  |  |  |
| 1.64 (-2.21, 5.5)     | 2.2 (-1.2, 5.61)        | 2.92 (-1.31, 7.22) | Insoluble fiber     |                     |                      |         |  |  |  |  |  |  |
| 0.36 (-2.95, 3.69)    | 0.93 (-1.63, 3.51)      | 1.65 (-2.11, 5.43) | -1.27 (-5.53, 3)    | Composite fibers    |                      |         |  |  |  |  |  |  |
| 1.98 (-0.91, 4.93)    | 2.54 (0.28, 4.85)       | 3.27 (-0.13, 6.73) | 0.34 (-2.18, 2.89)  | 1.61 (-1.8, 5.06)   | Medicine             |         |  |  |  |  |  |  |
| -1.35 (-3.18, 0.46)   | -0.79 (-1.85, 0.26)     | -0.07 (-2.62, 2.5) | -2.99 (-6.42, 0.41) | -1.71 (-4.51, 1.03) | -3.33 (-5.66, -1.08) | Placebo |  |  |  |  |  |  |

## 5e. Heterogeneous forest plot for studies on Severity of constipation

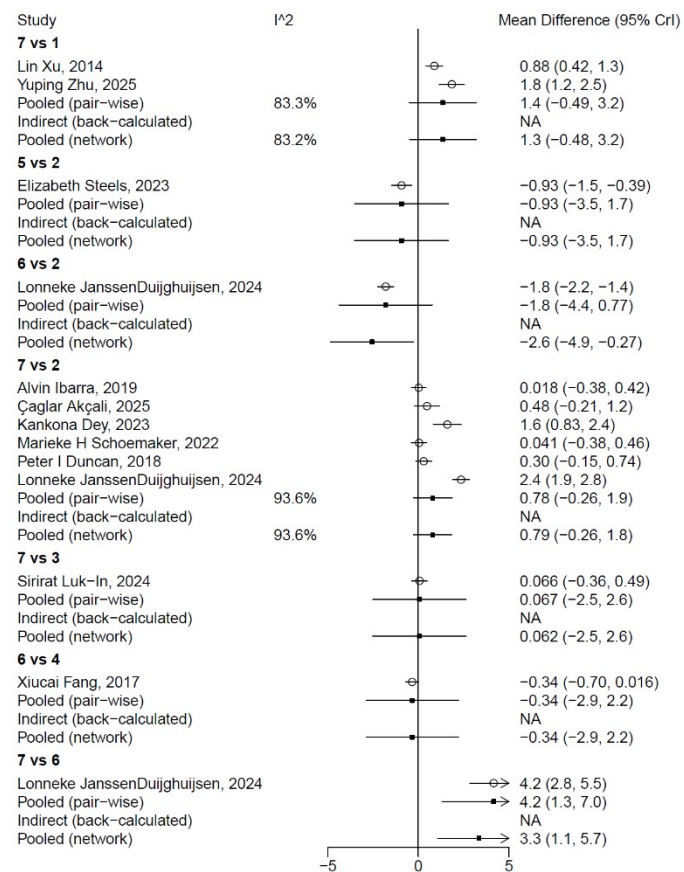

Ps: The interventions are coded as follows: 1, "Viscous soluble fiber"; 2, "Prebiotic soluble fiber"; 3, "Resistant starches"; 4, "Insoluble fiber"; 5, "Composite fibers"; 6, "Medicine "; 7, "Placebo".

#### 5f. Funnel plot of publication bias for studies on Severity of constipation

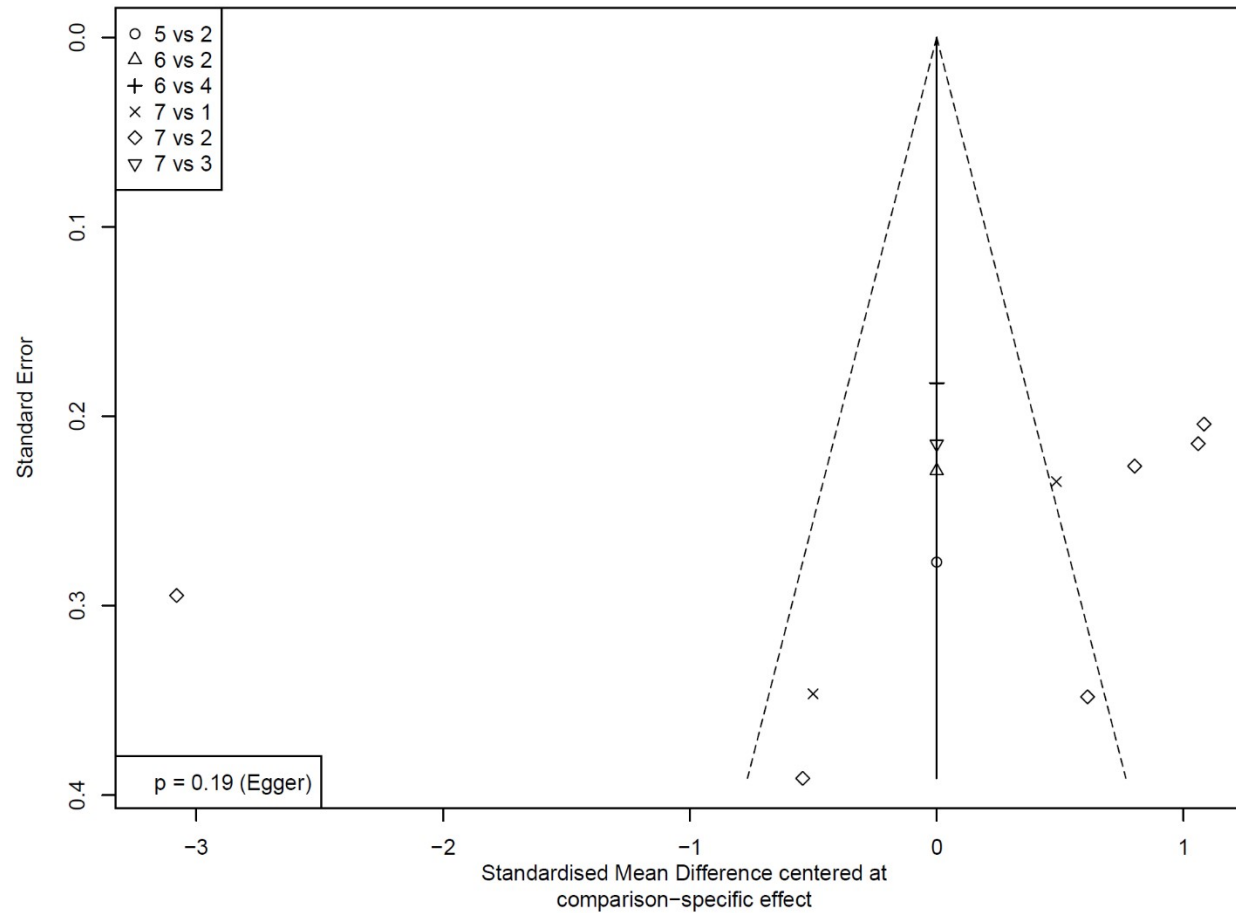

Ps: The interventions are coded as follows: 1, "Viscous soluble fiber"; 2, "Prebiotic soluble fiber"; 3, "Resistant starches"; 4, "Insoluble fiber"; 5, "Composite fibers"; 6, "Medicine "; 7, "Placebo".

5g. League table for the PYC-SYM Subgroup

|                       |                         |                     |                     |         |  |
|-----------------------|-------------------------|---------------------|---------------------|---------|--|
| Viscous soluble fiber |                         |                     |                     |         |  |
| -1.73 (-3.13, -0.32)  | Prebiotic soluble fiber |                     |                     |         |  |
| -1.78 (-3.46, -0.08)  | -0.04 (-1.39, 1.29)     | Resistant starches  |                     |         |  |
| -0.8 (-2.65, 1.03)    | 0.93 (-0.27, 2.11)      | 0.98 (-0.82, 2.76)  | Composite fibers    |         |  |
| -1.84 (-3.08, -0.59)  | -0.11 (-0.79, 0.55)     | -0.07 (-1.22, 1.09) | -1.05 (-2.41, 0.33) | Placebo |  |

**Supplementary Figure 6**

**6a. Network Diagram of the Effects of Dietary Interventions on Adverse event**

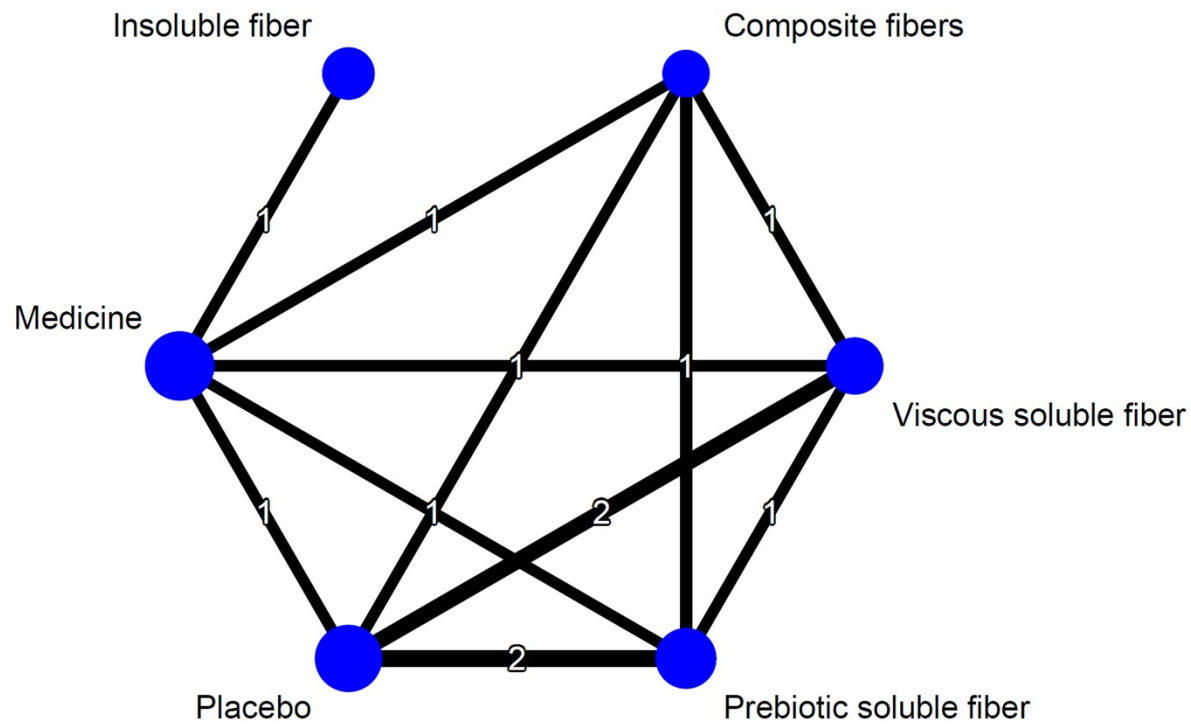

**6b. Trace plots and density plots of Markov chains on Adverse event**

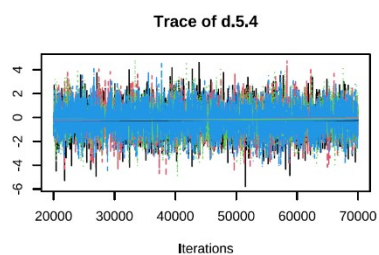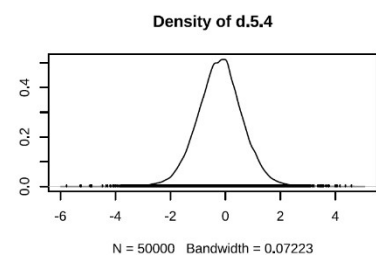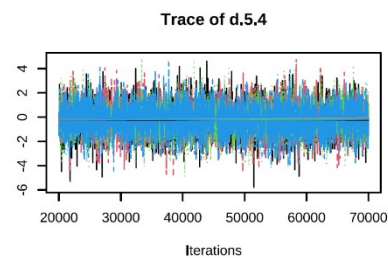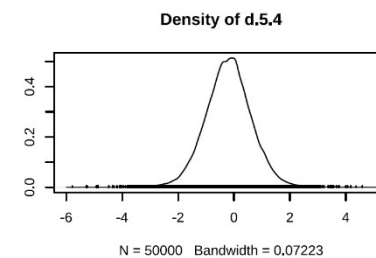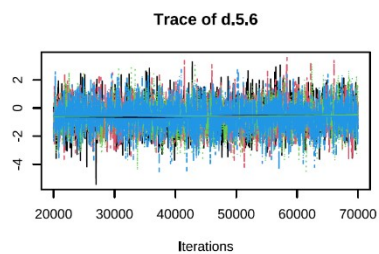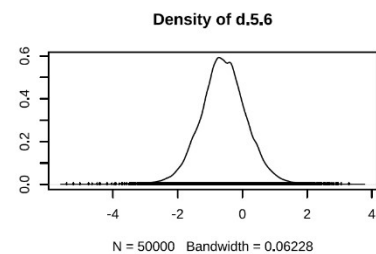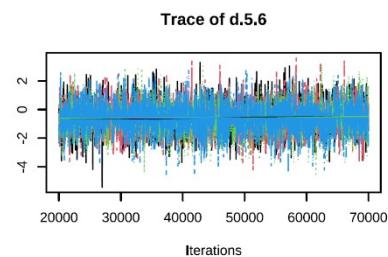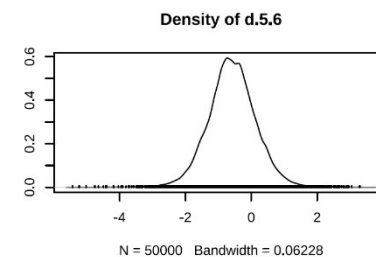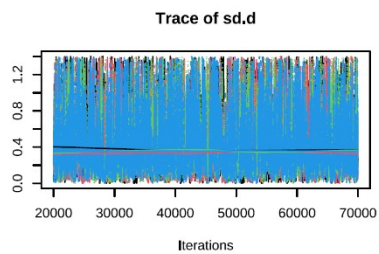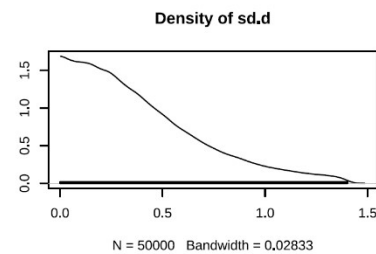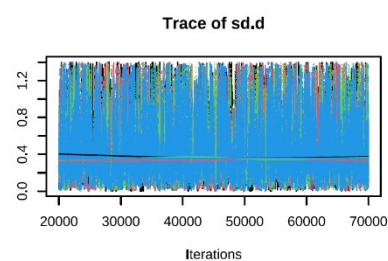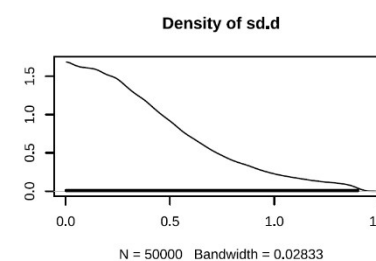

Ps: The interventions are coded as follows: 1, "Viscous soluble fiber"; 2, "Prebiotic soluble fiber"; 3, "Insoluble fiber"; 4, "Composite fibers"; 5, "Medicine "; 6, "Placebo".

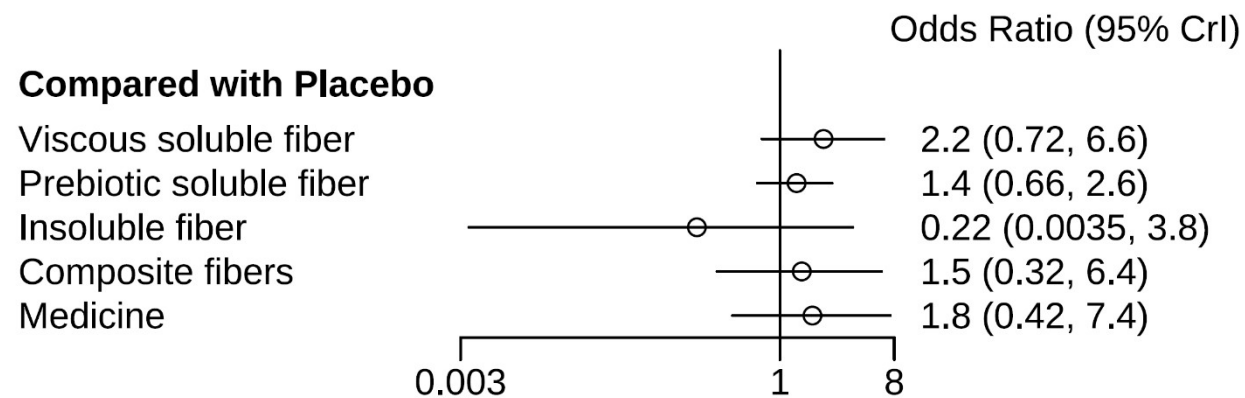

6c. Forest Plot for studies on Adverse event

6d. League table for studies on Adverse event

|                       |                         |                 |                   |                  |         |
|-----------------------|-------------------------|-----------------|-------------------|------------------|---------|
| Viscous soluble fiber |                         |                 |                   |                  |         |
| 1.63 (0.58, 4.78)     | Prebiotic soluble fiber |                 |                   |                  |         |
| 10.01 (0.59, 628.65)  | 6.13 (0.36, 378.35)     | Insoluble fiber |                   |                  |         |
| 1.49 (0.33, 6.8)      | 0.91 (0.21, 4.04)       | 0.15 (0, 2.86)  | Composite fibers  |                  |         |
| 1.22 (0.28, 5.2)      | 0.75 (0.18, 3.04)       | 0.13 (0, 1.34)  | 0.83 (0.16, 4.22) | Medicine         |         |
| 2.21 (0.72, 6.63)     | 1.35 (0.66, 2.58)       | 0.22 (0, 3.77)  | 1.49 (0.32, 6.37) | 1.8 (0.42, 7.45) | Placebo |
